# Supplementary material for: A color-tunable single molecule white light emitter with high luminescence efficiency and ultra-long room temperature phosphorescence
Source: Royal Society of Chemistry journal article supplement (doi:10.1039/d0tc04234j), 2020-12-10
Supplement: d0tc04234j1.pdf [file d0tc04234j1.pdf]

## Electronic Supplementary Information

# Color-tunable Single Molecule White Light Emitter with High Luminescent Efficiency and Ultra-long Room Temperature Phosphorescence

Xiao Ma,\* Ling Jia, Baozhu Yang, Jipeng Li, Wei Huang, Dayu Wu,\* and Wai-Yeung Wong\*

### Materials and Methods

**General Information.** All of the chemicals were obtained from commercial sources and used without further purification. The UV-Vis absorption spectra were measured with a Perkin Elmer Lambda 900 Spectrometer. Powder X-ray diffraction (PXRD) measurements were performed on a Bruker D8 Avance X-ray powder diffractometer with the Cu K $\alpha$  (1.5418 Å) source. NMR measurements were carried out on a Bruker DMX500 spectrometer using tetramethylsilane (TMS) as an internal standard. The elemental analysis was determined using a Vario EL III CHNOS elemental analyzer. Fluorescence spectra for the solid samples were recorded at room temperature on an Edinburgh Model FS5 instrument, and emission quantum yields were recorded on the integrating sphere SC-30. The calibration of quantum yields for the powdery (crystalline) samples is conducted with a matched integrating sphere. At first, the emission of the blank integrating sphere was measured, and then the emission of the integrating sphere containing the powdery (crystalline) samples was measured. Finally, the quantum yields could be obtained according to the calibration. Luminescence lifetimes ( $\tau$ )

were examined using an Edinburgh Model FLS920 phosphorimeter. The power of UV lamp used for photographs is 16 W.

**X-ray Crystallography.** Crystallographic data were collected on a multiwire proportional diffractometer with graphite-monochromated Mo K $\alpha$  radiation ( $\lambda = 0.71073 \text{ \AA}$ ) using phi and omega scans. The intensity data were integrated by using the SAINT program.<sup>[1]</sup> An empirical absorption correction was applied using the SADABS program.<sup>[2]</sup> The structures were solved by direct method and the non-hydrogen atoms were located from the trial structures and then refined anisotropically with SHELXTL using full-matrix least-squares procedures based on  $F^2$  values.<sup>[3]</sup> The positions of the non-hydrogen atoms were refined with anisotropic displacement factors.

### **Theoretical calculations**

All calculations were performed using the Gaussian 09 series of programs.<sup>[4]</sup> The commonly used Becke's three parameter exchange functional combined with the LYP4 correlation functional (B3LYP) was used for the calculations. The geometries of **P1**, **P2** and **P3** for calculations were taken from the X-ray diffraction data and no further geometry optimization was conducted in order to maintain the specific molecular configuration and corresponding intermolecular locations. The optimized excited-state geometries of **P1**, **P2** and **P3** were calculated by time-dependent density functional theory (TD-DFT) at the B3LYP/6-31G(d) level.

## Synthesis

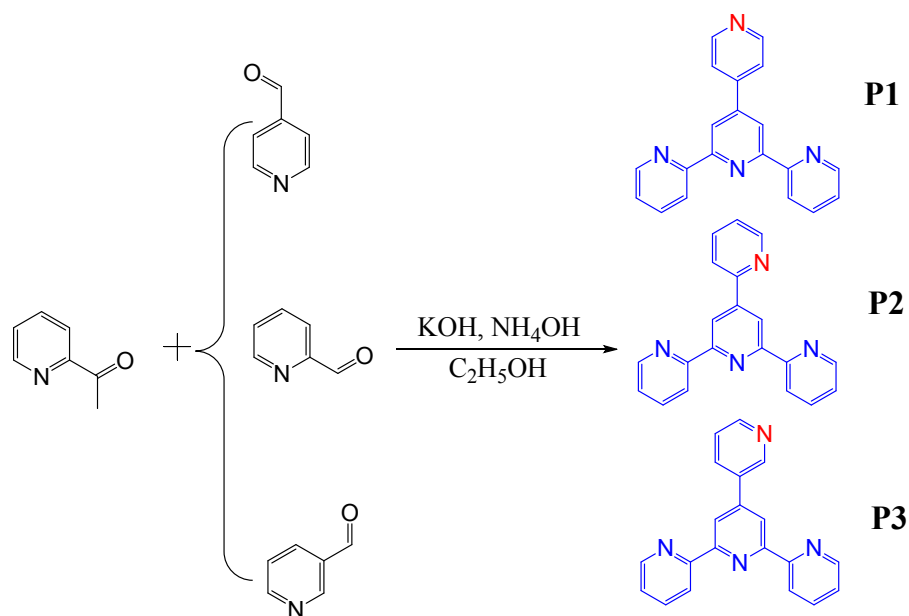

**Scheme 1** The synthetic route of **P1**, **P2** and **P3**

**4'-(Pyridin-4-yl)-2,2':6',2''-terpyridine (P1):** In a 250 mL round bottom flask, 2-Acetylpyridine (2.62 g, 21.6 mmol), NH<sub>3</sub> (aqueous) (15 mL) and KOH (2.3 g, 41.0 mmol) were respectively added to a solution of 4-pyridinecarboxaldehyde (1.14 g, 10.6 mmol) in EtOH (100 mL). The solution was refluxed for 24 h. After cooling down to the room temperature, the solution was evaporated to dryness under reduced pressure to give the crude product. The crude product was washed by cool methanol twice and then recrystallized by ethanol. A pure white solid was obtained. <sup>1</sup>H NMR: (400 MHz, DCM) δ 8.80 (6 H, m), 8.70 (2 H, d), 8.07 (2 H, m), 7.96 (2 H, d) and 7.56 (2 H, d). <sup>13</sup>C NMR: (400 MHz, DCM) δ: 156.4, 155.7, 150.5, 149.2, 147.4, 146.1, 137.0, 124.2, 121.8, 121.4, 118.7. Elemental Analysis: C, 77.40; H, 4.55; N, 18.05, found: C, 77.60; H, 4.75; N, 17.65 MS: m/z Calcd. for C<sub>20</sub>H<sub>14</sub>N<sub>4</sub>: 310.12, found [M+Na]<sup>+</sup> 333.05.

**4'-(Pyridin-2-yl)-2,2':6',2''-terpyridine (P2):** In a 250 mL round bottom flask, 2-acetylpyridine (2.62 g, 21.6 mmol), NH<sub>3</sub> (aqueous) (15 mL) and KOH (2.3g, 41.0 mmol) were respectively added to a solution of 4-pyridinecarboxaldehyde (1.14 g, 10.6 mmol) in EtOH

(100 mL). The solution was refluxed for 24 h. After cooling down to the room temperature, the solution was evaporated to dryness under reduced pressure to give the crude product. The crude product was washed by cool methanol twice and then recrystallized by ethanol. A pure white solid was obtained. <sup>1</sup>H NMR: (400 MHz, DCM) δ 9.15 (2 H, s), 8.85 (1 H, d), 8.78 (2 H, d), 8.71 (2 H, d), 8.13 (1 H, d), 7.91 (3 H, m) and 7.40 (3 H, m). <sup>13</sup>C NMR: (400 MHz, DCM) δ: 156.1, 155.1, 150.0, 149.2, 148.7, 136.9, 123.8, 121.3, 118.7. Elemental Analysis: C, 77.40; H, 4.55; N, 18.05, found: C, 77.55; H, 4.68; N, 17.77 MS: m/z Calcd. for C<sub>20</sub>H<sub>14</sub>N<sub>4</sub>: 310.12, found [M+Na]<sup>+</sup> 333.05.

**4'-(Pyridin-3-yl)-2,2':6',2''-terpyridine (P3):** In a 250 mL round bottom flask, 2-acetylpyridine (2.62 g, 21.6 mmol), NH<sub>3</sub> (aqueous) (15 mL) and KOH (2.3g, 41.0 mmol) were respectively added to a solution of 4-pyridinecarboxaldehyde (1.14 g, 10.6 mmol) in EtOH (100 mL). The solution was refluxed for 24 h. After cooling down to the room temperature, the solution was evaporated to dryness under reduced pressure to give the crude product. The crude product was washed by cool methanol twice and then recrystallized by ethanol. A pure white solid was obtained. <sup>1</sup>H NMR: (400 MHz, DCM) δ 9.16 (1 H, s), 8.10 (7 H, m), 8.22 (1 H, d), 7.94 (2 H, m), 7.49 (1 H, m), 7.42 (2 H, m). <sup>13</sup>C NMR: (400 MHz, DCM) δ: 156.2, 155.8, 150.1, 149.2, 148.4, 147.2, 137.0, 134.7, 134.3, 124.1, 123.7, 121.4, 118.8. Elemental Analysis: C, 77.40; H, 4.55; N, 18.05, found: C, 77.45; H, 4.80; N, 17.75 MS: m/z Calcd. for C<sub>20</sub>H<sub>14</sub>N<sub>4</sub>: 310.12, found [M+Na]<sup>+</sup> 333.05.

**Table S1.** Single crystal data and refinement results of **P1**, **P2** and **P3**

|                                                                               | <b>P1</b>                                                         | <b>P2</b>                                                         | <b>P3</b>                                                        |
|-------------------------------------------------------------------------------|-------------------------------------------------------------------|-------------------------------------------------------------------|------------------------------------------------------------------|
| formula                                                                       | C <sub>20</sub> H <sub>14</sub> N <sub>4</sub>                    | C <sub>20</sub> H <sub>14</sub> N <sub>4</sub>                    | C <sub>20</sub> H <sub>14</sub> N <sub>4</sub>                   |
| fw (g/mol)                                                                    | 310.35                                                            | 310.35                                                            | 310.35                                                           |
| color                                                                         | white                                                             | light yellow                                                      | white                                                            |
| <i>T</i> (K)                                                                  | 100                                                               | 300                                                               | 100                                                              |
| Crystal system                                                                | orthorhombic                                                      | monoclinic                                                        | orthorhombic                                                     |
| Space group                                                                   | <i>Pbcn</i>                                                       | <i>P121/c1</i>                                                    | <i>Pbcn</i>                                                      |
| <i>Z</i>                                                                      | 4                                                                 | 4                                                                 | 4                                                                |
| <i>a</i> [Å]                                                                  | 10.9973(5)                                                        | 8.3024(6)                                                         | 16.4088(8)                                                       |
| <i>b</i> [Å]                                                                  | 11.3955(5)                                                        | 16.0020(10)                                                       | 11.2036(5)                                                       |
| <i>c</i> [Å]                                                                  | 12.0267(5)                                                        | 11.5519(8)                                                        | 7.9268(4)                                                        |
| $\alpha$ [°]                                                                  | 90                                                                | 90                                                                | 90                                                               |
| $\beta$ [°]                                                                   | 90                                                                | 94.915(6)                                                         | 90                                                               |
| $\gamma$ [°]                                                                  | 90                                                                | 90                                                                | 90                                                               |
| <i>V</i> [Å <sup>3</sup> ]                                                    | 1507.18(11)                                                       | 1529.08(18)                                                       | 1457.24(12)                                                      |
| Density (calcd.) [g·cm <sup>-3</sup> ]                                        | 1.368                                                             | 1.348                                                             | 1.415                                                            |
| $\mu$ [mm <sup>-1</sup> ]                                                     | 0.084                                                             | 0.083                                                             | 0.087                                                            |
| $\theta$ -range [°]                                                           | 2.565 to 30.822                                                   | 2.168 to 30.538                                                   | 2.197 to 30.303                                                  |
| Index range                                                                   | -15 ≤ <i>h</i> ≤ 13<br>-15 ≤ <i>k</i> ≤ 13<br>-16 ≤ <i>l</i> ≤ 11 | -10 ≤ <i>h</i> ≤ 10<br>-19 ≤ <i>k</i> ≤ 19<br>-13 ≤ <i>l</i> ≤ 13 | -20 ≤ <i>h</i> ≤ 20<br>-12 ≤ <i>k</i> ≤ 15<br>-10 ≤ <i>l</i> ≤ 9 |
| Reflections collected                                                         | 6735                                                              | 17756                                                             | 8436                                                             |
| Unique reflections                                                            | 3659                                                              | 5404                                                              | 4080                                                             |
| Observed reflections ( <i>I</i> > 2σ( <i>I</i> ))                             | 1877                                                              | 2647                                                              | 1815                                                             |
| parameters refined                                                            | 111                                                               | 199                                                               | 217                                                              |
| Final <i>R</i> <sub>1</sub> values ( <i>I</i> > 2σ( <i>I</i> ))               | 0.0395                                                            | 0.0975                                                            | 0.0371                                                           |
| Final <i>wR</i> ( <i>F</i> <sup>2</sup> ) values ( <i>I</i> > 2σ( <i>I</i> )) | 0.0999                                                            | 0.2125                                                            | 0.0948                                                           |
| Final <i>R</i> <sub>2</sub> values (all data)                                 | 0.0472                                                            | 0.1563                                                            | 0.0465                                                           |
| Final <i>wR</i> ( <i>F</i> <sup>2</sup> ) values (all data)                   | 0.1043                                                            | 0.2338                                                            | 0.0993                                                           |
| GOOF (goodness of fit)                                                        | 1.097                                                             | 1.018                                                             | 1.043                                                            |
| CCDC number                                                                   | 2007820                                                           | 2007821                                                           | 2007822                                                          |

$$R_1 = \Sigma(|F_o| - |F_c|) / \Sigma|F_o|;$$

$$wR_2 = [\Sigma w(|F_o^2| - |F_c^2|)^2 / \Sigma w|F_o^2|^2]^{1/2}$$

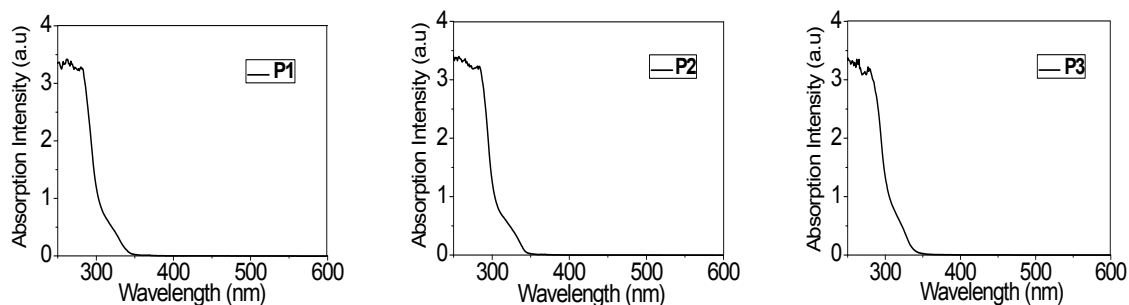

**Fig. S1** UV-vis absorption spectra of **P1**, **P2** and **P3** ( $\text{CH}_2\text{Cl}_2$ ,  $2 \times 10^{-5}$  mol/L).

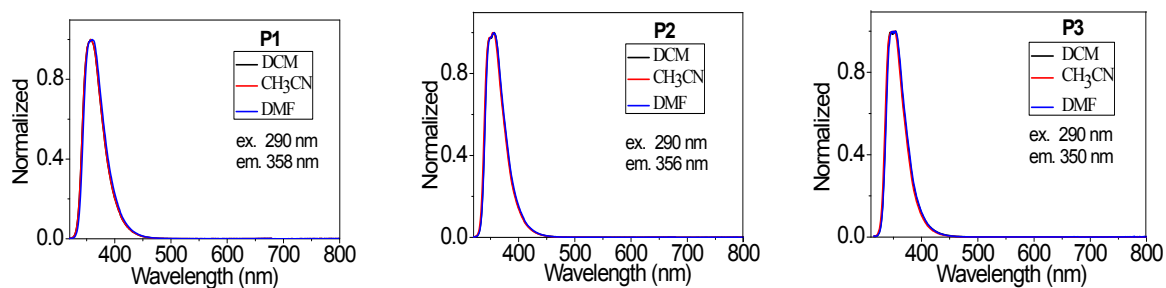

**Fig. S2** Photoluminescence spectra of **P1**, **P2** and **P3** in the dilute solutions of different solvents ( $2 \times 10^{-5}$  mol/L). (excitation wavelength = ex, emission wavelength = em).

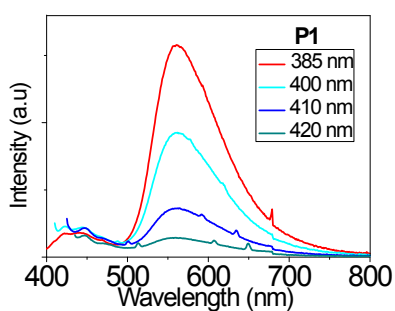

**Fig. S3** The excitation wavelength-dependent photoluminescence spectra for **P1** (Excitation wavelength is ranging from 385 nm to 420 nm). When the excitation wavelength is increased to 420 nm, the emission intensity obviously decays.

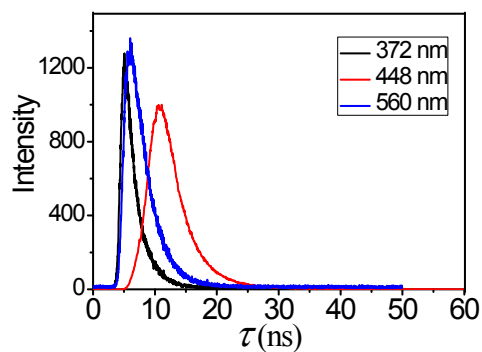

**Fig. S4** The time-resolved photoluminescence decay curves of **P1** at three emission peaks 372 nm ( $\lambda_{\text{ex}} = 340$  nm, 2.10 ns), 448 nm ( $\lambda_{\text{ex}} = 400$  nm, 3.82 ns) and 560 nm ( $\lambda_{\text{ex}} = 340$  nm, 2.77 ns).

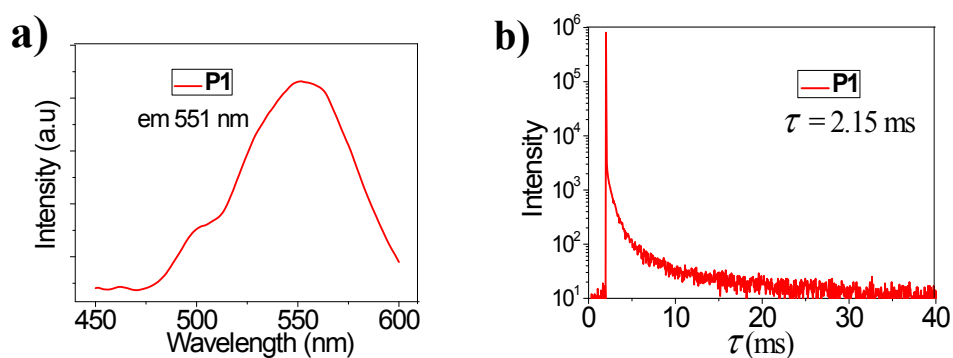

**Fig. S5** a) The phosphorescence emission spectra of **P1** ( $\lambda_{\text{ex}} = 358$  nm,  $\lambda_{\text{em}} = 551$  nm); b) the corresponding phosphorescence decay curves of **P1**.

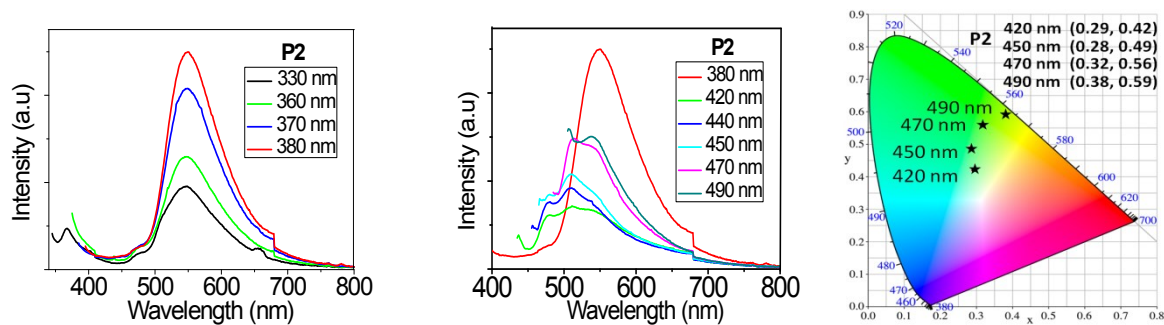

**Fig. S6** The excitation wavelength-dependent photoluminescence spectra ranging from 330 nm to 490 nm for **P2** and the CIE<sub>x,y</sub> coordinates of **P2** under several different excitation wavelengths.

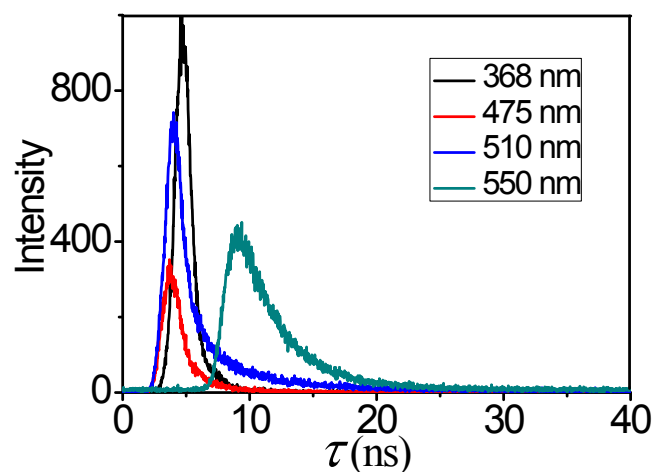

**Fig. S7** The time-resolved photoluminescence decay curves of **P2** at four emission peaks 368 nm ( $\lambda_{\text{ex}} = 340$  nm, 0.84 ns), 475 nm ( $\lambda_{\text{ex}} = 450$  nm, 1.30 ns) 510 nm ( $\lambda_{\text{ex}} = 450$  nm, 3.44 ns), and 550 nm ( $\lambda_{\text{ex}} = 380$  nm, 3.41 ns).



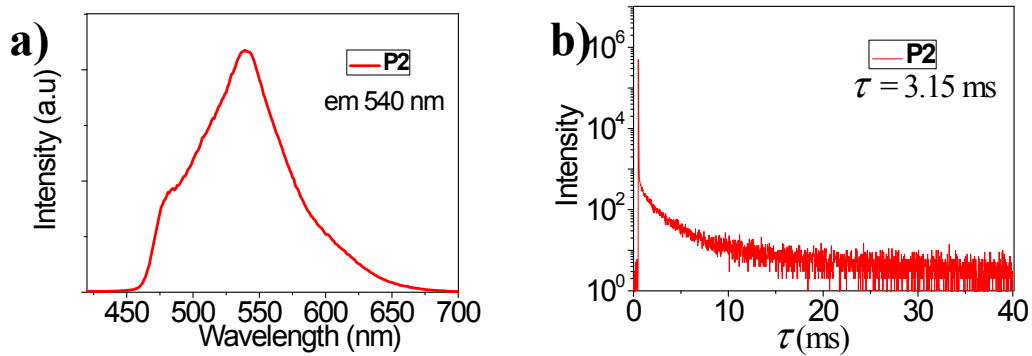

**Fig. S8** a) The phosphorescence emission spectra of **P2** ( $\lambda_{\text{ex}} = 380$  nm,  $\lambda_{\text{em}} = 540$  nm); b) the corresponding phosphorescence decay curves of **P2**.

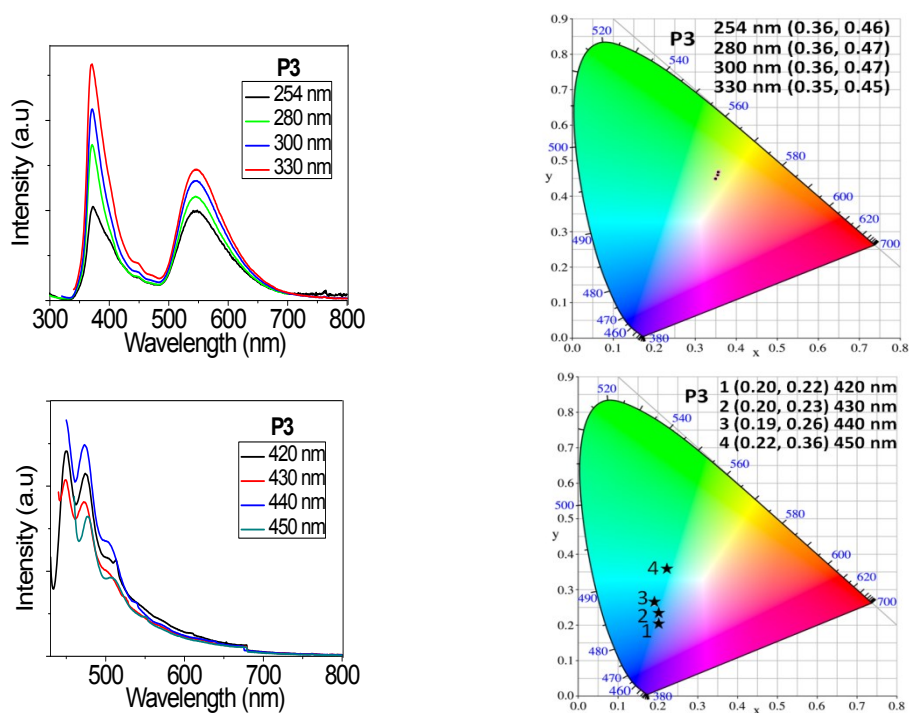

**Fig. S9** The excitation wavelength-dependent photoluminescence spectra and the corresponding CIE<sub>x,y</sub> coordinates of **P3**.

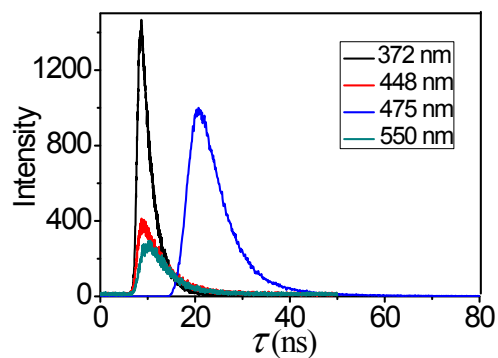

**Fig. S10** The transient photoluminescence decay curves of the emission peaks 372 nm ( $\lambda_{\text{ex}} = 340$  nm, 2.48 ns), 448 nm ( $\lambda_{\text{ex}} = 380$  nm, 4.7 ns), 475 nm ( $\lambda_{\text{ex}} = 380$  nm, 5.6 ns), and 550 nm ( $\lambda_{\text{ex}} = 380$  nm, 4.5 ns) for **P3**.

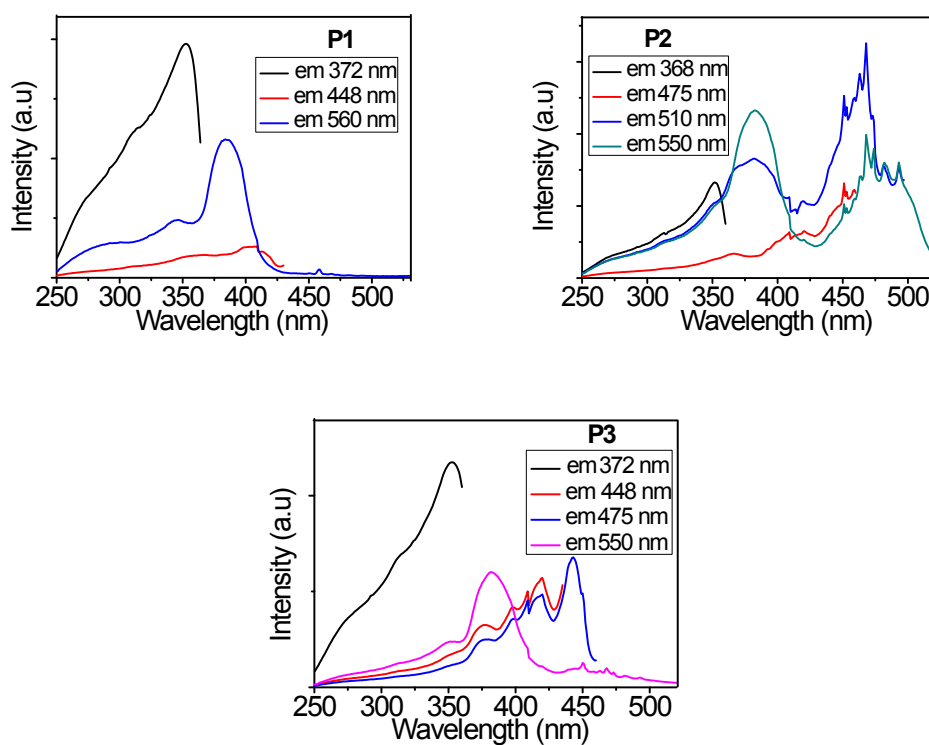

**Fig. S11** the corresponding excitation spectra of the different emission peaks of compounds **P1**, **P2** and **P3**

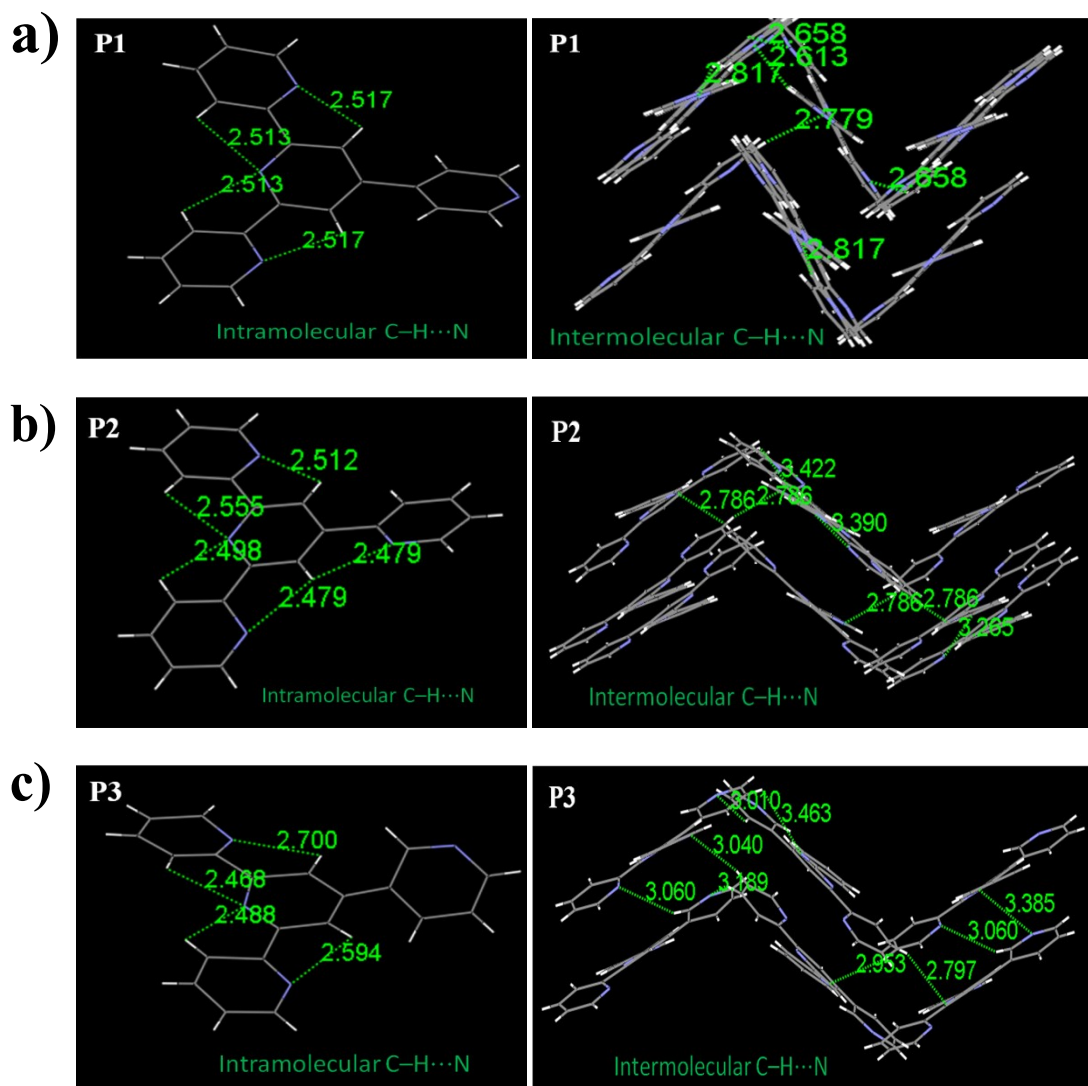

**Fig. S12** Numerous intramolecular C-H...N interactions and intermolecular C-H...N interactions in (a) **P1**, (b) **P2**, (c) **P3** crystals.

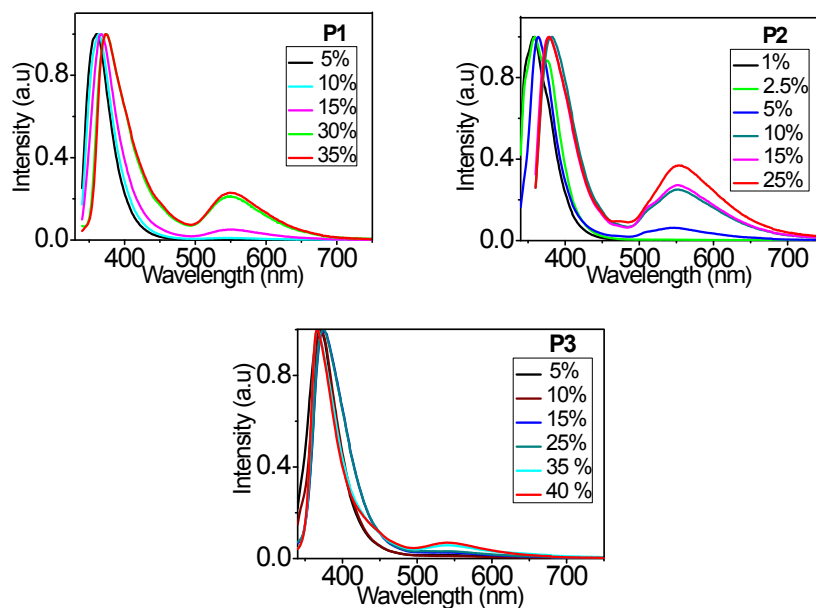

**Fig. S13** Emission spectra of **P1**, **P2** and **P3** with increasing concentrations in PMMA films upon excitation at 330 nm.

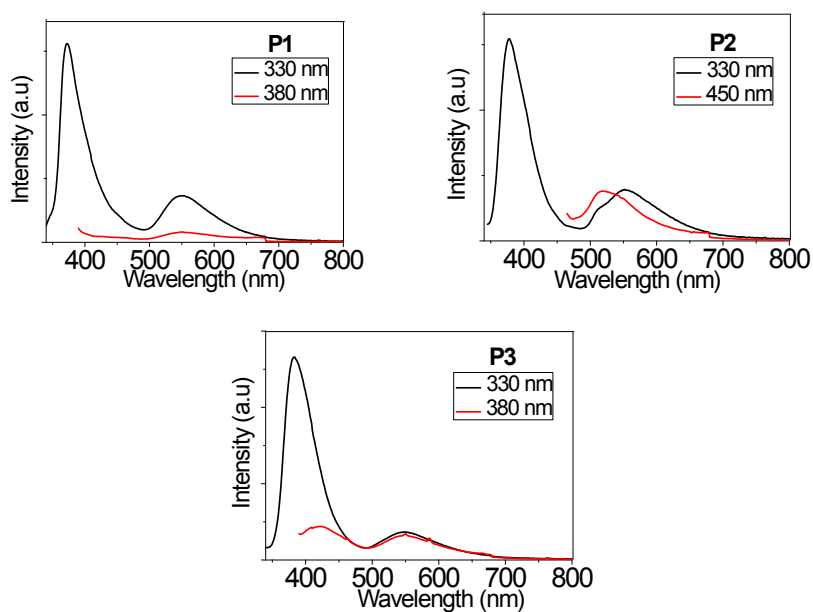

**Fig. S14** Excitation wavelength-dependent emissions of doped films of **P1** (35%wt), **P2** (25%wt) and **P3** (40%wt).

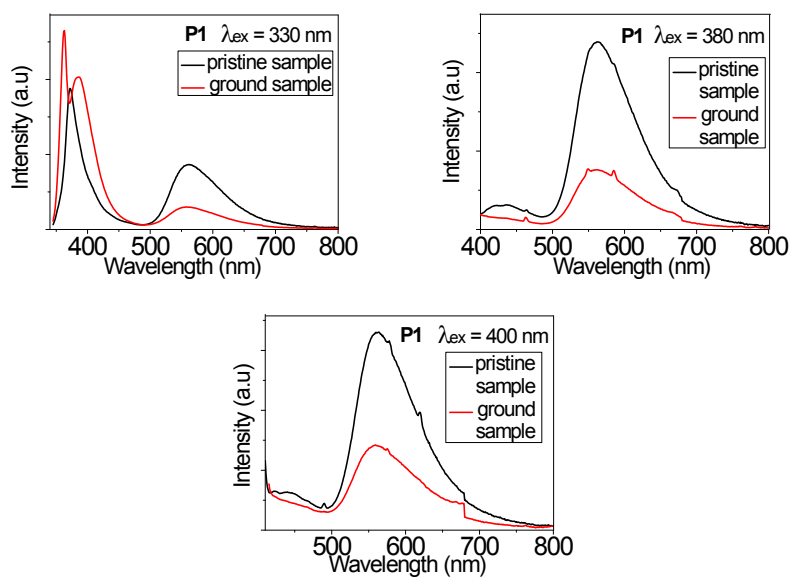

**Fig. S15** Emission spectra of both the pristine samples and the ground samples for **P1** under different excitation wavelengths.

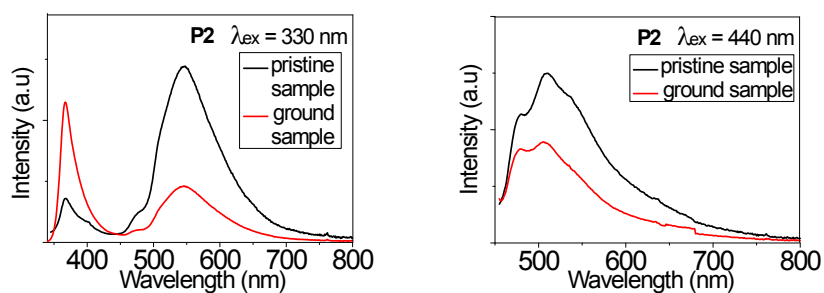

**Fig. S16** Emission spectra of both the pristine samples and the ground samples for **P2** under different excitation wavelengths.

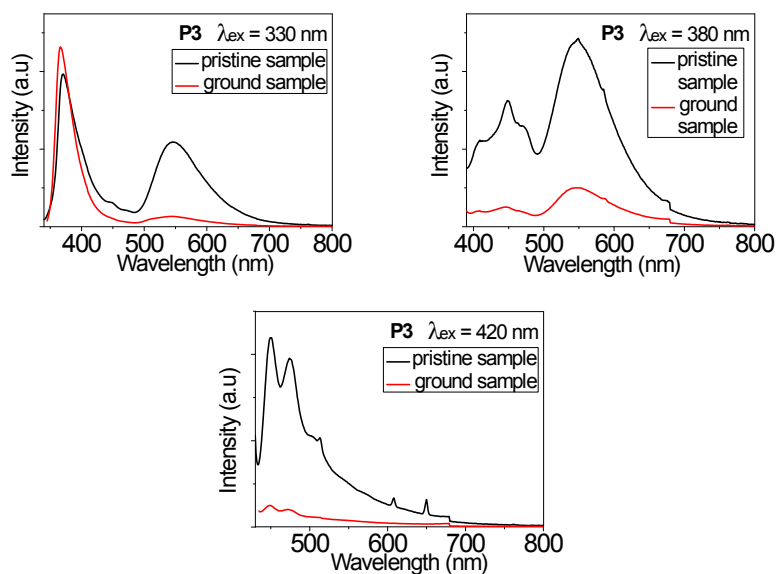

**Fig. S17** Emission spectra of both the pristine samples and the ground samples for **P3** under different excitation wavelengths.

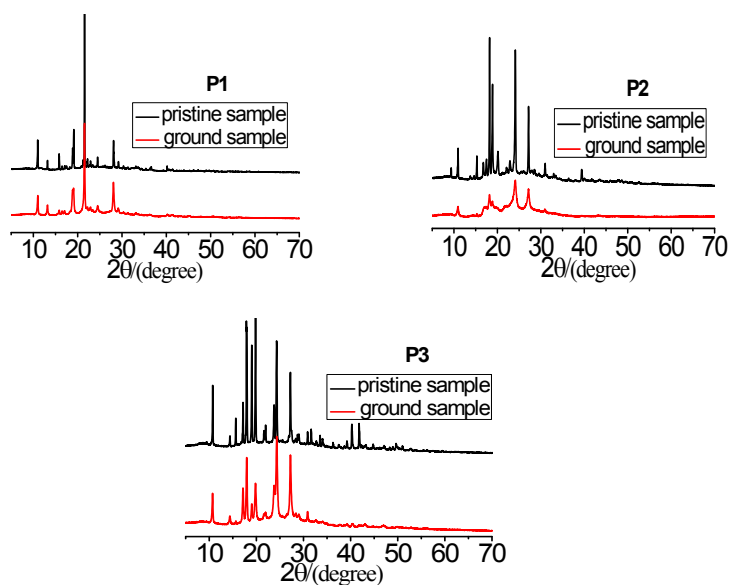

**Fig. S18** X-ray powder diffractions of both the pristine samples and the ground samples for **P1**, **P2** and **P3**.

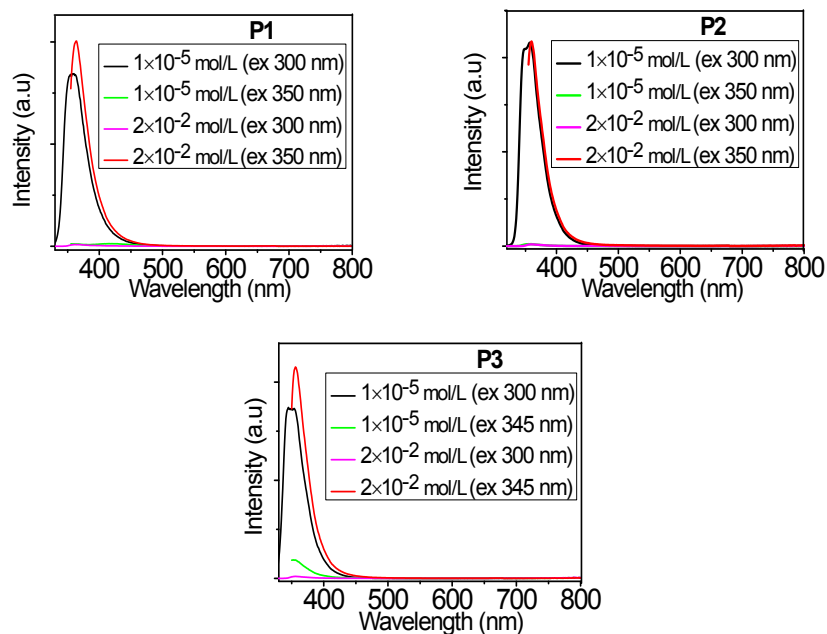

**Fig. S19** Emission spectra of compounds **P1**, **P2** and **P3** irradiated by different excitation wavelengths at different concentrations in  $\text{CH}_2\text{Cl}_2$ .

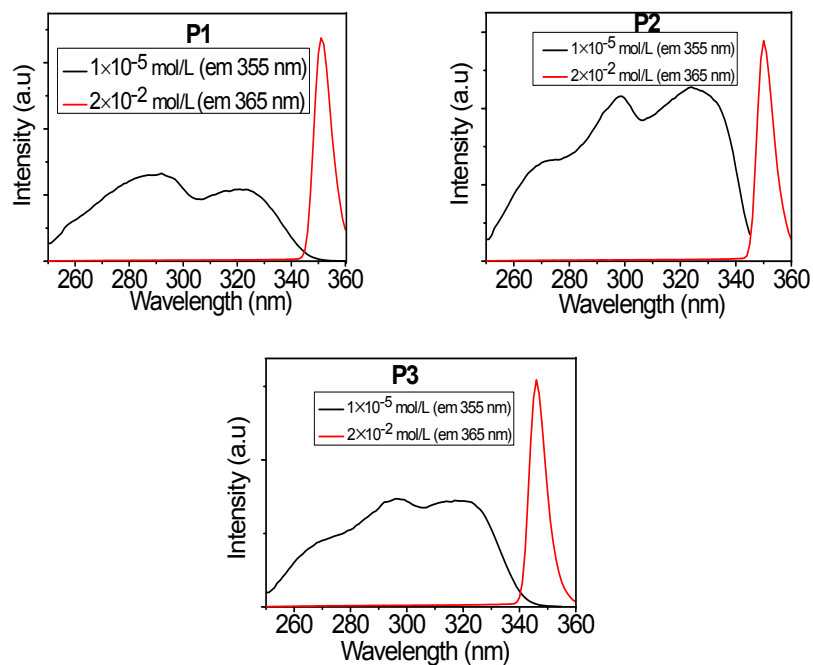

**Fig. S20** Fluorescence excitation spectra of **P1**, **P2** and **P3** at different concentrations in  $\text{CH}_2\text{Cl}_2$ .

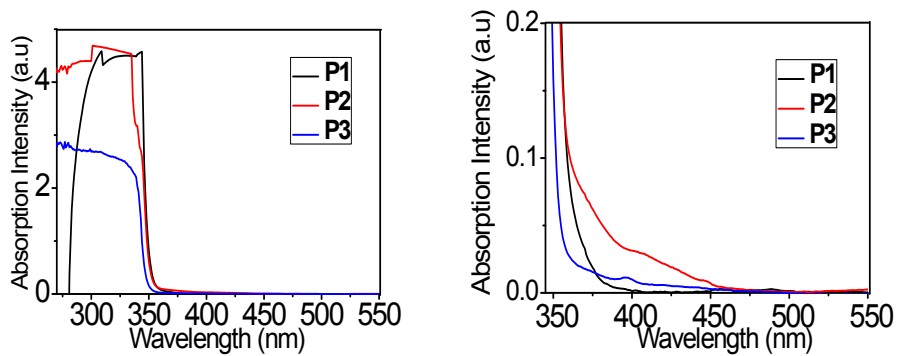

**Fig. S21** The UV-Vis absorption spectra of **P1**, **P2** and **P3** at  $2 \times 10^{-2}$  mol/L in  $\text{CH}_2\text{Cl}_2$ .

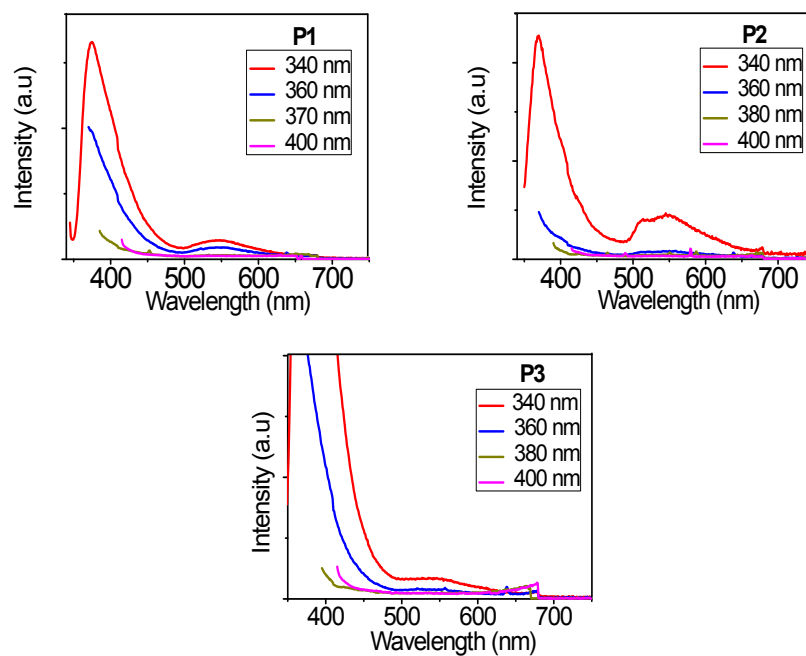

**Fig. S22** Emission spectra of thin films of **P1**, **P2** and **P3** under different excitation wavelengths.



**Table S2.** The singlet and triplet excited state transition configurations for the dimer of **P1** from single crystal by TD-DFT calculations at the B3LYP/6-31G(d) level.

| Excited state  | Energy    | Orbitals                                                                                                          | Transition                                                                                          |
|----------------|-----------|-------------------------------------------------------------------------------------------------------------------|-----------------------------------------------------------------------------------------------------|
| T <sub>1</sub> | 2.8007 eV | 158 ->167<br>159 ->163<br>159 ->164<br>160 ->163<br>160 ->164<br>161 ->165<br>161 ->166<br>162 ->165<br>162 ->166 | -0.10679<br>-0.17841<br>0.13147<br>0.16258<br>-0.18289<br>-0.26915<br>0.20587<br>0.2422<br>-0.28529 |
| T <sub>2</sub> | 2.8054 eV | 159 ->163<br>159 ->164<br>160 ->163<br>160 ->164<br>161 ->165<br>161 ->166<br>162 ->165<br>162 ->166              | 0.15221<br>0.19314<br>0.17186<br>0.13698<br>0.21043<br>0.2718<br>0.28631<br>0.2356                  |
| T <sub>3</sub> | 3.3015 eV | 159 ->166<br>160 ->165<br>161 ->163<br>161 ->164<br>161 ->167<br>162 ->163<br>162 ->164<br>162 ->167              | 0.13006<br>0.15868<br>-0.10789<br>0.29006<br>0.13091<br>0.34707<br>-0.10347<br>-0.14311             |
| T <sub>4</sub> | 3.3072 eV | 159 ->165<br>160 ->166<br>161 ->163<br>161 ->164<br>161 ->168<br>162 ->163<br>162 ->164<br>162 ->168              | 0.13296<br>0.15477<br>0.29958<br>0.10909<br>-0.1221<br>0.10629<br>0.32398<br>-0.15584               |
| T <sub>5</sub> | 3.4615 eV | 153 ->173<br>155 ->174<br>156 ->163<br>157 ->163<br>157 ->173<br>158 ->163                                        | 0.12252<br>0.17959<br>-0.12701<br>0.19273<br>-0.14343<br>-0.10422                                   |

|                |           |                                                                                                                                                                                                              |                                                                                                                                                                                       |
|----------------|-----------|--------------------------------------------------------------------------------------------------------------------------------------------------------------------------------------------------------------|---------------------------------------------------------------------------------------------------------------------------------------------------------------------------------------|
|                |           | 158 ->164<br>158 ->174<br>159 ->164<br>160 ->163<br>160 ->167<br>161 ->166<br>162 ->165                                                                                                                      | 0.25035<br>-0.10741<br>0.12624<br>0.14536<br>0.13096<br>-0.13497<br>-0.15135                                                                                                          |
| T <sub>6</sub> | 3.4664 eV | 153 ->174<br>155 ->173<br>156 ->164<br>156 ->174<br>157 ->164<br>157 ->174<br>158 ->163<br>159 ->163<br>160 ->164<br>160 ->168<br>161 ->165<br>162 ->166                                                     | -0.13549<br>-0.17362<br>-0.13711<br>0.10486<br>0.20282<br>0.12338<br>0.23131<br>0.14141<br>0.14122<br>0.11633<br>-0.12255<br>-0.14911                                                 |
| T <sub>7</sub> | 3.9734 eV | 139 ->163<br>141 ->166<br>142 ->165<br>144 ->170<br>145 ->169<br>147 ->171<br>148 ->172<br>155 ->173<br>157 ->169<br>159 ->172<br>160 ->169<br>161 ->165<br>161 ->171<br>161 ->177<br>162 ->166<br>162 ->178 | -0.10593<br>-0.16576<br>-0.17788<br>0.1167<br>-0.12257<br>0.15485<br>-0.11711<br>-0.11425<br>-0.1126<br>0.12038<br>0.10378<br>-0.11997<br>-0.11216<br>0.14785<br>-0.12965<br>-0.15095 |
| T <sub>8</sub> | 3.9784 eV | 141 ->165<br>142 ->166<br>144 ->169<br>145 ->167<br>147 ->170<br>148 ->171<br>157 ->173<br>159 ->169<br>161 ->166<br>161 ->178<br>162 ->165<br>162 ->177                                                     | -0.16366<br>-0.1736<br>0.13541<br>-0.10077<br>0.14855<br>0.15276<br>-0.12153<br>0.1368<br>-0.12495<br>-0.14348<br>-0.14283<br>0.15678                                                 |
| T <sub>9</sub> | 4.0098 eV | 141 ->164<br>142 ->163<br>145 ->166<br>148 ->169                                                                                                                                                             | 0.14226<br>0.16622<br>-0.10277<br>0.10186                                                                                                                                             |

|                 |           |                                                                                                                                                                                                 |                                                                                                                                                                          |
|-----------------|-----------|-------------------------------------------------------------------------------------------------------------------------------------------------------------------------------------------------|--------------------------------------------------------------------------------------------------------------------------------------------------------------------------|
|                 |           | 158 ->165<br>161 ->163<br>161 ->175<br>162 ->163<br>162 ->164<br>162 ->167<br>162 ->176                                                                                                         | 0.1073<br>0.2695<br>0.13799<br>-0.11824<br>0.30327<br>-0.10084<br>-0.15104                                                                                               |
| T <sub>10</sub> | 4.0312 eV | 141 ->163<br>142 ->164<br>144 ->170<br>147 ->169<br>161 ->164<br>161 ->176<br>162 ->163<br>162 ->164<br>162 ->175                                                                               | 0.14806<br>0.16018<br>0.1092<br>0.10636<br>0.25993<br>-0.13628<br>0.29933<br>0.11644<br>0.15406                                                                          |
| S1              | 4.3648 eV | 161 ->164<br>162 ->163                                                                                                                                                                          | 0.38325<br>0.5153                                                                                                                                                        |
| S2              | 4.3786 eV | 161 ->163<br>162 ->164                                                                                                                                                                          | 0.42308<br>0.47366                                                                                                                                                       |
| S3              | 4.7308 eV | 161 ->166<br>162 ->164<br>162 ->165                                                                                                                                                             | 0.38275<br>-0.12126<br>0.50501                                                                                                                                           |
| S4              | 4.7903 eV | 143 ->163<br>143 ->164<br>146 ->163<br>146 ->164<br>151 ->165<br>151 ->166<br>152 ->166<br>153 ->163<br>153 ->164<br>154 ->163<br>154 ->164<br>154 ->167<br>155 ->163<br>156 ->163<br>156 ->164 | -0.12497<br>0.10386<br>0.13538<br>-0.14075<br>-0.11904<br>0.10309<br>-0.11908<br>-0.1651<br>0.16885<br>0.27009<br>-0.19996<br>-0.13328<br>0.11357<br>-0.19128<br>0.17902 |
| S5              | 4.7957 eV | 143 ->163<br>143 ->164<br>146 ->163<br>146 ->164<br>151 ->166<br>152 ->165<br>152 ->166<br>153 ->163<br>153 ->164<br>154 ->163<br>154 ->164                                                     | -0.11372<br>-0.13522<br>-0.13434<br>-0.11825<br>-0.12164<br>-0.11252<br>-0.11238<br>0.18333<br>0.15849<br>0.22481<br>0.23815                                             |

|     |           |                                                                                                                                                          |                                                                                                                                          |
|-----|-----------|----------------------------------------------------------------------------------------------------------------------------------------------------------|------------------------------------------------------------------------------------------------------------------------------------------|
|     |           | 154 ->168<br>155 ->163<br>155 ->164<br>156 ->163<br>156 ->164                                                                                            | -0.13351<br>0.10045<br>0.11821<br>0.20288<br>0.16118                                                                                     |
| S6  | 4.8147 eV | 159 ->163<br>161 ->165<br>162 ->163<br>162 ->166                                                                                                         | 0.10604<br>0.38298<br>0.10183<br>0.47316                                                                                                 |
| S7  | 4.9111 eV | 151 ->163<br>151 ->167<br>152 ->164<br>152 ->167<br>153 ->165<br>153 ->166<br>154 ->165<br>154 ->166<br>155 ->165<br>156 ->165<br>156 ->166              | -0.17083<br>0.19425<br>-0.14668<br>-0.17619<br>-0.10002<br>0.23838<br>0.32924<br>-0.1308<br>0.11839<br>-0.1086<br>0.23096                |
| S8  | 4.9143 eV | 151 ->164<br>151 ->168<br>152 ->163<br>152 ->168<br>153 ->165<br>153 ->166<br>154 ->165<br>154 ->166<br>155 ->166<br>156 ->165<br>156 ->166<br>162 ->166 | 0.14319<br>-0.18293<br>0.16667<br>-0.18125<br>-0.22741<br>-0.10989<br>-0.13086<br>-0.32147<br>-0.1205<br>-0.23343<br>-0.10023<br>0.11309 |
| S9  | 5.0279 eV | 148 ->163<br>149 ->163<br>149 ->164<br>149 ->167<br>150 ->163<br>151 ->165<br>152 ->166<br>154 ->167                                                     | 0.11172<br>-0.11146<br>0.24754<br>-0.11915<br>0.23018<br>0.20448<br>0.2023<br>0.12258                                                    |
| S10 | 5.0295 eV | 148 ->164<br>149 ->163<br>150 ->163<br>150 ->164<br>150 ->168<br>151 ->166<br>152 ->165<br>154 ->168                                                     | -0.10371<br>-0.22454<br>-0.15869<br>-0.27465<br>-0.16194<br>-0.19292<br>-0.19902<br>-0.1088                                              |

**Table S3.** The singlet and triplet excited state transition configurations for the dimer of **P2** from single crystal by TD-DFT calculations at the B3LYP/6-31G(d) level.

| Excited state  | Energy    | Orbitals                                                                                                                                    | Transition                                                                                                                |
|----------------|-----------|---------------------------------------------------------------------------------------------------------------------------------------------|---------------------------------------------------------------------------------------------------------------------------|
| T <sub>1</sub> | 2.9260 eV | 159 ->164<br>160 ->163<br>161 ->166<br>162 ->165                                                                                            | -0.26583<br>-0.28912<br>0.30103<br>0.32848                                                                                |
| T <sub>2</sub> | 2.9281 eV | 159 ->163<br>160 ->164<br>161 ->165<br>162 ->166                                                                                            | -0.27165<br>-0.2802<br>0.33593<br>0.29297                                                                                 |
| T <sub>3</sub> | 3.4014 eV | 155 ->166<br>158 ->165<br>160 ->165<br>161 ->164<br>161 ->168<br>162 ->163<br>162 ->167                                                     | 0.13613<br>0.14367<br>-0.12203<br>0.35646<br>0.11002<br>0.38349<br>0.11432                                                |
| T <sub>4</sub> | 3.4150 eV | 155 ->165<br>158 ->166<br>160 ->166<br>161 ->163<br>161 ->167<br>162 ->164<br>162 ->168                                                     | 0.16526<br>0.11338<br>-0.10706<br>0.37867<br>0.1099<br>0.36417<br>0.11488                                                 |
| T <sub>5</sub> | 3.6455 eV | 145 ->168<br>146 ->169<br>155 ->164<br>158 ->163<br>159 ->164<br>159 ->173<br>160 ->163<br>160 ->167<br>160 ->172<br>161 ->166<br>162 ->165 | -0.13719<br>-0.13506<br>0.13441<br>0.18646<br>0.22178<br>-0.10722<br>0.18487<br>-0.1073<br>-0.14099<br>0.15503<br>0.17893 |
| T <sub>6</sub> | 3.6515 eV | 145 ->167<br>145 ->169<br>146 ->168<br>155 ->163<br>158 ->164<br>159 ->163                                                                  | 0.10576<br>0.13625<br>0.13083<br>-0.13925<br>-0.1825<br>-0.21587                                                          |

|                 |           |                                                                                                                                                                                                                                        |                                                                                                                                                                                                              |
|-----------------|-----------|----------------------------------------------------------------------------------------------------------------------------------------------------------------------------------------------------------------------------------------|--------------------------------------------------------------------------------------------------------------------------------------------------------------------------------------------------------------|
|                 |           | 159 ->164<br>159 ->167<br>159 ->172<br>160 ->164<br>160 ->173<br>161 ->165<br>162 ->166                                                                                                                                                | 0.11197<br>0.11562<br>0.14317<br>-0.19152<br>0.10701<br>-0.1764<br>-0.15964                                                                                                                                  |
| T <sub>7</sub>  | 3.8573 eV | 149 ->163<br>149 ->164<br>150 ->163<br>150 ->164<br>156 ->163<br>156 ->164<br>157 ->163<br>157 ->164                                                                                                                                   | 0.12059<br>-0.12909<br>0.17154<br>-0.17681<br>-0.23172<br>0.22472<br>0.29621<br>-0.29974                                                                                                                     |
| T <sub>8</sub>  | 3.8580 eV | 149 ->163<br>149 ->164<br>150 ->163<br>150 ->164<br>156 ->163<br>156 ->164<br>157 ->163<br>157 ->164                                                                                                                                   | 0.15773<br>0.15098<br>-0.14825<br>-0.14793<br>0.29921<br>0.27997<br>0.24937<br>0.22465                                                                                                                       |
| T <sub>9</sub>  | 4.1021 eV | 149 ->163<br>149 ->164<br>150 ->163<br>150 ->164<br>153 ->163<br>153 ->165<br>153 ->167<br>153 ->170<br>154 ->163<br>154 ->164<br>154 ->165<br>154 ->167<br>154 ->170<br>156 ->165<br>156 ->166<br>156 ->170<br>157 ->165<br>157 ->166 | 0.13108<br>0.10647<br>-0.1248<br>-0.10215<br>0.12293<br>0.10903<br>0.10979<br>0.10122<br>-0.13092<br>-0.10085<br>-0.11621<br>-0.11561<br>-0.10609<br>-0.19441<br>-0.1765<br>-0.11868<br>-0.15006<br>-0.13816 |
| T <sub>10</sub> | 4.1064eV  | 149 ->163<br>150 ->163<br>150 ->164<br>153 ->163<br>153 ->164<br>153 ->165<br>153 ->167<br>153 ->170<br>154 ->163<br>154 ->164                                                                                                         | 0.10111<br>0.14041<br>-0.12331<br>-0.11998<br>0.10098<br>0.11371<br>-0.11311<br>0.10352<br>-0.12235<br>0.10229                                                                                               |

|    |           |                                                                                                                                                                                    |                                                                                                                                                             |
|----|-----------|------------------------------------------------------------------------------------------------------------------------------------------------------------------------------------|-------------------------------------------------------------------------------------------------------------------------------------------------------------|
|    |           | 154 ->165<br>154 ->167<br>154 ->170<br>156 ->165<br>156 ->166<br>157 ->165<br>157 ->166<br>157 ->170                                                                               | 0.11646<br>-0.11301<br>0.10455<br>-0.15566<br>0.13875<br>0.19252<br>-0.17198<br>0.11248                                                                     |
| S1 | 4.4404 eV | 161 ->163<br>162 ->164                                                                                                                                                             | 0.47662<br>0.45344                                                                                                                                          |
| S2 | 4.4709 eV | 156 ->164<br>157 ->163<br>161 ->164<br>162 ->163                                                                                                                                   | -0.15424<br>-0.16867<br>0.41139<br>0.43694                                                                                                                  |
| S3 | 4.5120 eV | 149 ->164<br>150 ->163<br>154 ->165<br>156 ->163<br>157 ->164                                                                                                                      | 0.16927<br>-0.19384<br>0.10852<br>0.41083<br>0.39394                                                                                                        |
| S4 | 4.5183 eV | 149 ->163<br>150 ->164<br>153 ->165<br>156 ->164<br>156 ->165<br>157 ->163<br>161 ->164<br>162 ->163                                                                               | 0.14737<br>-0.17281<br>-0.10082<br>0.35182<br>0.10632<br>0.38054<br>0.17993<br>0.18721                                                                      |
| S5 | 4.7629 eV | 149 ->163<br>149 ->164<br>150 ->163<br>150 ->164<br>153 ->163<br>153 ->164<br>153 ->167<br>154 ->163<br>154 ->164<br>154 ->167<br>156 ->165<br>156 ->166<br>157 ->165<br>157 ->166 | -0.12024<br>-0.10215<br>0.11918<br>0.10148<br>-0.15177<br>-0.12746<br>-0.11009<br>0.15946<br>0.13343<br>0.11467<br>0.26264<br>0.23763<br>0.20713<br>0.18732 |
| S6 | 4.7650 eV | 150 ->163<br>150 ->164<br>153 ->163<br>153 ->164<br>153 ->167<br>154 ->163<br>154 ->164<br>154 ->167<br>156 ->165                                                                  | 0.12987<br>-0.11951<br>-0.14813<br>0.13532<br>-0.11276<br>-0.15049<br>0.13509<br>-0.11358<br>-0.2136                                                        |

|     |           |                                                                                                                                             |                                                                                                                          |
|-----|-----------|---------------------------------------------------------------------------------------------------------------------------------------------|--------------------------------------------------------------------------------------------------------------------------|
|     |           | 156 ->166<br>157 ->165<br>157 ->166                                                                                                         | 0.18752<br>0.26687<br>-0.23722                                                                                           |
| S7  | 4.8980 eV | 153 ->166<br>154 ->165<br>158 ->163<br>160 ->163<br>161 ->166<br>162 ->165                                                                  | -0.138<br>0.13876<br>0.11016<br>-0.10568<br>0.3348<br>0.44603                                                            |
| S8  | 4.9204 eV | 150 ->164<br>153 ->165<br>154 ->166<br>156 ->165<br>157 ->166<br>157 ->167<br>161 ->165<br>162 ->166                                        | 0.12204<br>-0.20504<br>0.20396<br>-0.10436<br>-0.1069<br>0.10165<br>0.34582<br>0.31133                                   |
| S9  | 4.9679 eV | 149 ->164<br>150 ->163<br>150 ->167<br>153 ->166<br>153 ->167<br>154 ->165<br>156 ->166<br>156 ->167<br>157 ->165<br>161 ->166<br>162 ->165 | -0.16859<br>0.18795<br>0.12373<br>-0.2787<br>0.1127<br>0.28392<br>-0.11716<br>0.12717<br>-0.1223<br>-0.16166<br>-0.22365 |
| S10 | 4.9830 eV | 149 ->163<br>149 ->167<br>150 ->164<br>153 ->165<br>154 ->166<br>157 ->167<br>161 ->165<br>162 ->166                                        | 0.15081<br>0.10086<br>-0.15667<br>0.2393<br>-0.23495<br>-0.1099<br>0.2994<br>0.26647                                     |

**Table S4.** The singlet and triplet excited state transition configurations for the dimers of **P3** from single crystal by TD-DFT calculations at the B3LYP/6-31G(d) level.

| Excited state  | Energy    | Orbitals                                                                   | Transition                                          |
|----------------|-----------|----------------------------------------------------------------------------|-----------------------------------------------------|
| T <sub>1</sub> | 2.2659 eV | 143 ->163<br>159 ->168<br>161 ->163<br>161 ->164<br>162 ->163<br>162 ->164 | 0.10133<br>0.10643<br>0.32356<br>0.13169<br>0.49318 |



|                |           |                                                                                                                                                          |                                                                                                                                          |
|----------------|-----------|----------------------------------------------------------------------------------------------------------------------------------------------------------|------------------------------------------------------------------------------------------------------------------------------------------|
|                |           | 162 <-163                                                                                                                                                | 0.1648<br>0.11193                                                                                                                        |
| T <sub>2</sub> | 2.3839 eV | 160 ->165<br>161 ->163<br>161 ->164<br>162 ->163<br>162 ->164                                                                                            | 0.15441<br>-0.17857<br>0.41467<br>0.10929<br>-0.31898                                                                                    |
| T <sub>3</sub> | 2.8801 eV | 144 ->164<br>153 ->164<br>153 ->165<br>153 ->166<br>160 ->164<br>160 ->167<br>160 ->169<br>161 ->165<br>161 ->166<br>162 ->165<br>162 ->166              | 0.11154<br>-0.15623<br>-0.14932<br>-0.10385<br>-0.16458<br>-0.12739<br>-0.10374<br>-0.26981<br>-0.17238<br>0.26001<br>0.11724            |
| T <sub>4</sub> | 3.0358 eV | 148 ->166<br>148 ->168<br>154 ->163<br>154 ->165<br>154 ->166<br>154 ->168<br>159 ->163<br>160 ->163<br>160 ->168<br>161 ->165<br>162 ->165<br>162 ->166 | -0.10042<br>0.11301<br>-0.10253<br>-0.20674<br>0.25972<br>-0.15634<br>0.10402<br>-0.14611<br>-0.17837<br>-0.10765<br>-0.15568<br>0.23691 |
| T <sub>5</sub> | 3.0630 eV | 154 ->163<br>154 ->166<br>159 ->163<br>159 ->166<br>159 ->168<br>160 ->163<br>160 ->165<br>160 ->166<br>160 ->168<br>161 ->168<br>162 ->167<br>162 ->168 | 0.1657<br>-0.10667<br>0.21603<br>0.12563<br>0.11656<br>-0.16771<br>0.15476<br>-0.17042<br>-0.10451<br>0.12214<br>-0.10621<br>0.25153     |
| T <sub>6</sub> | 3.2136 eV | 153 ->164<br>158 ->165<br>159 ->164<br>159 ->165                                                                                                         | 0.16954<br>-0.15215<br>-0.10085<br>0.13285                                                                                               |

|                 |           |                                                                                                                                                                       |                                                                                                                                              |
|-----------------|-----------|-----------------------------------------------------------------------------------------------------------------------------------------------------------------------|----------------------------------------------------------------------------------------------------------------------------------------------|
|                 |           | 160 ->165<br>160 ->166<br>160 ->169<br>161 ->164<br>161 ->167<br>161 ->169<br>162 ->167<br>162 ->169                                                                  | 0.22329<br>0.15435<br>-0.11132<br>-0.13642<br>0.13092<br>0.18633<br>-0.10099<br>-0.14477                                                     |
| T <sub>7</sub>  | 3.6218 eV | 143 ->163<br>155 ->163<br>157 ->163<br>157 ->164<br>157 ->166<br>158 ->163<br>159 ->163<br>162 ->175                                                                  | -0.10642<br>-0.15172<br>0.40821<br>0.12802<br>0.11565<br>0.21024<br>-0.16025<br>-0.12042                                                     |
| T <sub>8</sub>  | 3.7130 eV | 143 ->163<br>154 ->163<br>154 ->168<br>155 ->163<br>156 ->171<br>157 ->163<br>158 ->164<br>158 ->165<br>159 ->164<br>161 ->175<br>162 ->175                           | -0.1339<br>-0.13628<br>0.10126<br>0.10961<br>0.1314<br>-0.25208<br>-0.12938<br>0.16057<br>-0.11697<br>-0.1138<br>-0.15724                    |
| T <sub>9</sub>  | 3.7134 eV | 156 ->167<br>156 ->169<br>156 ->170<br>156 ->171<br>157 ->163<br>158 ->163<br>158 ->164<br>158 ->165<br>158 ->171<br>159 ->164<br>159 ->165<br>159 ->171<br>162 ->175 | 0.11479<br>0.13454<br>0.12253<br>0.17965<br>0.15392<br>0.12224<br>-0.14224<br>0.17967<br>-0.11373<br>-0.13569<br>0.179<br>-0.1157<br>0.11582 |
| T <sub>10</sub> | 3.8105 eV | 142 ->164<br>144 ->167<br>146 ->164<br>146 ->167<br>146 ->168<br>146 ->169<br>147 ->167<br>153 ->169<br>161 ->176                                                     | -0.14092<br>-0.10863<br>0.18261<br>-0.41549<br>-0.13602<br>0.20179<br>0.11473<br>0.13834<br>0.10943                                          |

|    |           |                                                                                                                                                          |                                                                                                                                   |
|----|-----------|----------------------------------------------------------------------------------------------------------------------------------------------------------|-----------------------------------------------------------------------------------------------------------------------------------|
| S1 | 3.9100 eV | 155 ->163<br>157 ->163<br>157 ->164<br>157 ->175<br>158 ->163<br>159 ->163                                                                               | -0.22189<br>0.52489<br>0.18195<br>0.10066<br>0.23776<br>-0.1467                                                                   |
| S2 | 4.0527 eV | 156 ->163<br>156 ->164<br>156 ->169<br>157 ->164<br>158 ->163<br>158 ->164<br>159 ->163<br>159 ->164                                                     | -0.13324<br>0.33878<br>-0.11122<br>-0.12432<br>-0.16874<br>0.40947<br>-0.10964<br>0.26372                                         |
| S3 | 4.2595 eV | 157 ->163<br>161 ->163<br>161 ->164<br>162 ->163                                                                                                         | -0.12362<br>0.26575<br>0.18232<br>0.54425                                                                                         |
| S4 | 4.2791 eV | 156 ->164<br>156 ->167<br>156 ->169<br>156 ->171<br>156 ->177<br>157 ->165<br>158 ->165<br>158 ->166<br>159 ->165<br>159 ->166<br>160 ->165              | 0.18715<br>0.11813<br>0.13265<br>0.10378<br>0.10528<br>-0.10505<br>0.37703<br>0.19583<br>0.28255<br>0.13468<br>0.12098            |
| S5 | 4.3696 eV | 161 ->163<br>161 ->164<br>161 ->165<br>162 ->164<br>162 ->165<br>162 ->166                                                                               | 0.2464<br>-0.36722<br>-0.24604<br>0.36952<br>0.14724<br>0.13346                                                                   |
| S6 | 4.4255 eV | 156 ->164<br>156 ->165<br>156 ->166<br>158 ->165<br>158 ->166<br>158 ->169<br>158 ->171<br>159 ->167<br>159 ->169<br>159 ->171<br>161 ->165<br>162 ->165 | -0.13714<br>0.41382<br>0.20116<br>0.13461<br>0.10481<br>0.11999<br>0.11382<br>0.10814<br>0.11553<br>0.11242<br>0.14093<br>-0.1346 |
| S7 | 4.4741 eV | 155 ->163<br>155 ->168<br>157 ->165                                                                                                                      | 0.14605<br>0.12313<br>-0.30989                                                                                                    |

|     |           |           |          |
|-----|-----------|-----------|----------|
|     |           | 157 ->166 | 0.35784  |
|     |           | 157 ->168 | 0.14163  |
|     |           | 158 ->165 | -0.14826 |
|     |           | 158 ->166 | 0.14774  |
|     |           | 162 ->165 | -0.13784 |
| S8  | 4.4979 eV | 156 ->165 | 0.1239   |
|     |           | 157 ->165 | -0.10174 |
|     |           | 159 ->164 | 0.12644  |
|     |           | 160 ->164 | 0.11161  |
|     |           | 161 ->164 | 0.1995   |
|     |           | 161 ->165 | -0.3106  |
|     |           | 161 ->166 | -0.17543 |
|     |           | 162 ->163 | 0.12875  |
|     |           | 162 ->164 | -0.13718 |
|     |           | 162 ->165 | 0.35662  |
| S9  | 4.5439 eV | 157 ->163 | -0.15642 |
|     |           | 157 ->166 | -0.10401 |
|     |           | 159 ->163 | -0.31711 |
|     |           | 160 ->163 | 0.3199   |
|     |           | 160 ->164 | 0.12059  |
|     |           | 161 ->165 | -0.17924 |
|     |           | 162 ->163 | -0.13282 |
|     |           | 162 ->164 | -0.13609 |
|     |           | 162 ->165 | -0.11161 |
|     |           | 162 ->166 | 0.20766  |
| S10 | 4.6210 eV | 155 ->163 | 0.25588  |
|     |           | 155 ->165 | -0.2028  |
|     |           | 155 ->166 | 0.20581  |
|     |           | 155 ->168 | 0.20478  |
|     |           | 155 ->171 | 0.11382  |
|     |           | 157 ->166 | -0.10647 |
|     |           | 157 ->168 | 0.1083   |
|     |           | 157 ->171 | 0.10831  |
|     |           | 159 ->163 | -0.10958 |
|     |           | 160 ->163 | 0.14142  |
|     |           | 161 ->165 | 0.14572  |
|     |           | 162 ->165 | 0.16605  |
|     |           | 162 ->166 | -0.16449 |

**Table S5.** The selected calculated spin orbital coupling (SOC) coefficient for the dimer of **P1** in different transition paths.

| Transition                     | SOC (cm <sup>-1</sup> ) | Transition                      | SOC (cm <sup>-1</sup> ) |
|--------------------------------|-------------------------|---------------------------------|-------------------------|
| S <sub>0</sub> →T <sub>3</sub> | 28.08                   | S <sub>5</sub> →T <sub>1</sub>  | 2.25                    |
| S <sub>0</sub> →T <sub>5</sub> | 3.33                    | S <sub>5</sub> →T <sub>10</sub> | 5.21                    |
| S <sub>0</sub> →T <sub>7</sub> | 41.13                   | S <sub>6</sub> →T <sub>2</sub>  | 2.94                    |

|                                 |      |                                 |      |
|---------------------------------|------|---------------------------------|------|
| S <sub>1</sub> →T <sub>1</sub>  | 2.21 | S <sub>6</sub> →T <sub>8</sub>  | 2.99 |
| S <sub>1</sub> →T <sub>4</sub>  | 7.73 | S <sub>6</sub> →T <sub>10</sub> | 1.59 |
| S <sub>1</sub> →T <sub>9</sub>  | 2.03 | S <sub>7</sub> →T <sub>5</sub>  | 1.97 |
| S <sub>1</sub> →T <sub>10</sub> | 3.97 | S <sub>7</sub> →T <sub>7</sub>  | 3.52 |
| S <sub>2</sub> →T <sub>1</sub>  | 8.14 | S <sub>8</sub> →T <sub>10</sub> | 2.12 |
| S <sub>2</sub> →T <sub>4</sub>  | 4.28 | S <sub>9</sub> →T <sub>1</sub>  | 4.48 |
| S <sub>2</sub> →T <sub>9</sub>  | 3.51 | S <sub>9</sub> →T <sub>9</sub>  | 2.98 |
| S <sub>2</sub> →T <sub>10</sub> | 3.15 | S <sub>9</sub> →T <sub>10</sub> | 1.93 |
| S <sub>4</sub> →T <sub>2</sub>  | 5.13 | S <sub>10</sub> →T <sub>8</sub> | 4.44 |
| S <sub>4</sub> →T <sub>8</sub>  | 3.60 |                                 |      |

**Table S6.** The selected calculated spin orbital coupling (SOC) coefficient for the dimer of **P2** in different transition paths.

| Transition                      | SOC (cm <sup>-1</sup> ) | Transition                       | SOC (cm <sup>-1</sup> ) |
|---------------------------------|-------------------------|----------------------------------|-------------------------|
| S <sub>0</sub> →T <sub>4</sub>  | 6.69                    | S <sub>6</sub> →T <sub>2</sub>   | 2.68                    |
| S <sub>0</sub> →T <sub>5</sub>  | 25.72                   | S <sub>6</sub> →T <sub>3</sub>   | 1.94                    |
| S <sub>0</sub> →T <sub>6</sub>  | 12.10                   | S <sub>6</sub> →T <sub>8</sub>   | 2.74                    |
| S <sub>0</sub> →T <sub>7</sub>  | 40.45                   | S <sub>6</sub> →T <sub>9</sub>   | 1.80                    |
| S <sub>1</sub> →T <sub>1</sub>  | 6.63                    | S <sub>6</sub> →T <sub>10</sub>  | 2.48                    |
| S <sub>1</sub> →T <sub>9</sub>  | 3.95                    | S <sub>7</sub> →T <sub>4</sub>   | 1.78                    |
| S <sub>1</sub> →T <sub>10</sub> | 4.59                    | S <sub>7</sub> →T <sub>7</sub>   | 3.56                    |
| S <sub>3</sub> →T <sub>1</sub>  | 4.29                    | S <sub>8</sub> →T <sub>4</sub>   | 6.72                    |
| S <sub>3</sub> →T <sub>3</sub>  | 7.28                    | S <sub>8</sub> →T <sub>5</sub>   | 3.71                    |
| S <sub>3</sub> →T <sub>10</sub> | 5.75                    | S <sub>8</sub> →T <sub>6</sub>   | 2.09                    |
| S <sub>4</sub> →T <sub>2</sub>  | 4.93                    | S <sub>8</sub> →T <sub>7</sub>   | 2.72                    |
| S <sub>4</sub> →T <sub>3</sub>  | 1.97                    | S <sub>9</sub> →T <sub>1</sub>   | 3.53                    |
| S <sub>4</sub> →T <sub>8</sub>  | 3.83                    | S <sub>9</sub> →T <sub>9</sub>   | 2.87                    |
| S <sub>5</sub> →T <sub>1</sub>  | 3.16                    | S <sub>9</sub> →T <sub>10</sub>  | 2.26                    |
| S <sub>5</sub> →T <sub>3</sub>  | 4.52                    | S <sub>10</sub> →T <sub>8</sub>  | 1.70                    |
| S <sub>5</sub> →T <sub>10</sub> | 3.88                    | S <sub>10</sub> →T <sub>10</sub> | 4.20                    |

**Table S7.** The calculated spin orbital coupling (SOC) coefficient for the dimer of **P3** in different transition paths.

| Transition                      | SOC (cm <sup>-1</sup> ) | Transition                      | SOC (cm <sup>-1</sup> ) |
|---------------------------------|-------------------------|---------------------------------|-------------------------|
| S <sub>0</sub> →T <sub>4</sub>  | 4.16                    | S <sub>6</sub> →T <sub>3</sub>  | 2.20                    |
| S <sub>0</sub> →T <sub>5</sub>  | 11.55                   | S <sub>7</sub> →T <sub>4</sub>  | 2.43                    |
| S <sub>0</sub> →T <sub>6</sub>  | 20.44                   | S <sub>7</sub> →T <sub>7</sub>  | 2.98                    |
| S <sub>0</sub> →T <sub>7</sub>  | 44.21                   | S <sub>8</sub> →T <sub>2</sub>  | 2.16                    |
| S <sub>1</sub> →T <sub>1</sub>  | 5.50                    | S <sub>8</sub> →T <sub>3</sub>  | 1.58                    |
| S <sub>1</sub> →T <sub>8</sub>  | 3.67                    | S <sub>8</sub> →T <sub>2</sub>  | 2.16                    |
| S <sub>3</sub> →T <sub>2</sub>  | 5.04                    | S <sub>8</sub> →T <sub>3</sub>  | 1.58                    |
| S <sub>3</sub> →T <sub>9</sub>  | 1.81                    | S <sub>8</sub> →T <sub>10</sub> | 4.81                    |
| S <sub>3</sub> →T <sub>10</sub> | 4.99                    | S <sub>9</sub> →T <sub>4</sub>  | 2.28                    |
| S <sub>4</sub> →T <sub>3</sub>  | 2.74                    | S <sub>9</sub> →T <sub>5</sub>  | 1.68                    |
| S <sub>4</sub> →T <sub>8</sub>  | 1.83                    | S <sub>9</sub> →T <sub>6</sub>  | 1.82                    |
| S <sub>5</sub> →T <sub>1</sub>  | 1.77                    | S <sub>9</sub> →T <sub>7</sub>  | 2.02                    |
| S <sub>5</sub> →T <sub>3</sub>  | 5.45                    | S <sub>10</sub> →T <sub>4</sub> | 4.77                    |
| S <sub>5</sub> →T <sub>10</sub> | 1.63                    | S <sub>10</sub> →T <sub>5</sub> | 2.39                    |
| S <sub>6</sub> →T <sub>2</sub>  | 2.37                    | S <sub>10</sub> →T <sub>7</sub> | 3.57                    |

## References

- [1] SMART & SAINT Software Reference Manuals, version 6.45; Bruker Analytical X-ray Systems, Inc.: Madison, WI, 2003.
- [2] Sheldrick, G. M. SADABS: Software for Empirical Absorption Correction, version 2.05; University of Göttingen: Göttingen, Germany, 2002.
- [3] Sheldrick, G. M. SHELXL97: Program for Crystal Structure Refinement; University of Göttingen: Göttingen, Germany, 1997.
- [4] Gaussian 09, Revision A.02, Frisch, M. J.; Trucks, G. W.; Schlegel, H. B.; Scuseria, G. E.; Robb, M. A.; Cheeseman, J. R.; Scalmani, G.; Barone, V.; Mennucci, B.; Petersson,

G. A.; Nakatsuji, H.; Caricato, M.; Li, X.; Hratchian, H. P.; Izmaylov, A. F.; Bloino, J.; Zheng, G.; Sonnenberg, J. L.; Hada, M.; Ehara, M.; Toyota, K.; Fukuda, R.; Hasegawa, J.; Ishida, M.; Nakajima, T.; Honda, Y.; Kitao, O.; Nakai, H.; Vreven, T.; Montgomery, J. A., Jr.; Peralta, J. E.; Ogliaro, F.; Bearpark, M.; Heyd, J. J.; Brothers, E.; Kudin, K. N.; Staroverov, V. N.; Kobayashi, R.; Normand, J.; Raghavachari, K.; Rendell, A.; Burant, J. C.; Iyengar, S. S.; Tomasi, J.; Cossi, M.; Rega, N.; Millam, J. M.; Klene, M.; Knox, J. E.; Cross, J. B.; Bakken, V.; Adamo, C.; Jaramillo, J.; Gomperts, R.; Stratmann, R. E.; Yazyev, O.; Austin, A. J.; Cammi, R.; Pomelli, C.; Ochterski, J. W.; Martin, R. L.; Morokuma, K.; Zakrzewski, V. G.; Voth, G. A.; Salvador, P.; Dannenberg, J. J.; Dapprich, S.; Daniels, A. D.; Farkas, O.; Foresman, J. B.; Ortiz, J. V.; Cioslowski, J.; Fox, D. J. Gaussian, Inc., Wallingford CT, 2009.
